# Supplementary material
Source: PubMed Central journal article supplement (PMC6713619)
Supplement: NIHMS1522417-supplement-Supplemental_Digital_Content_to_Be_Published__cited_in_text__2.pdf [file NIHMS1522417-supplement-Supplemental_Digital_Content_to_Be_Published__cited_in_text__2.pdf]

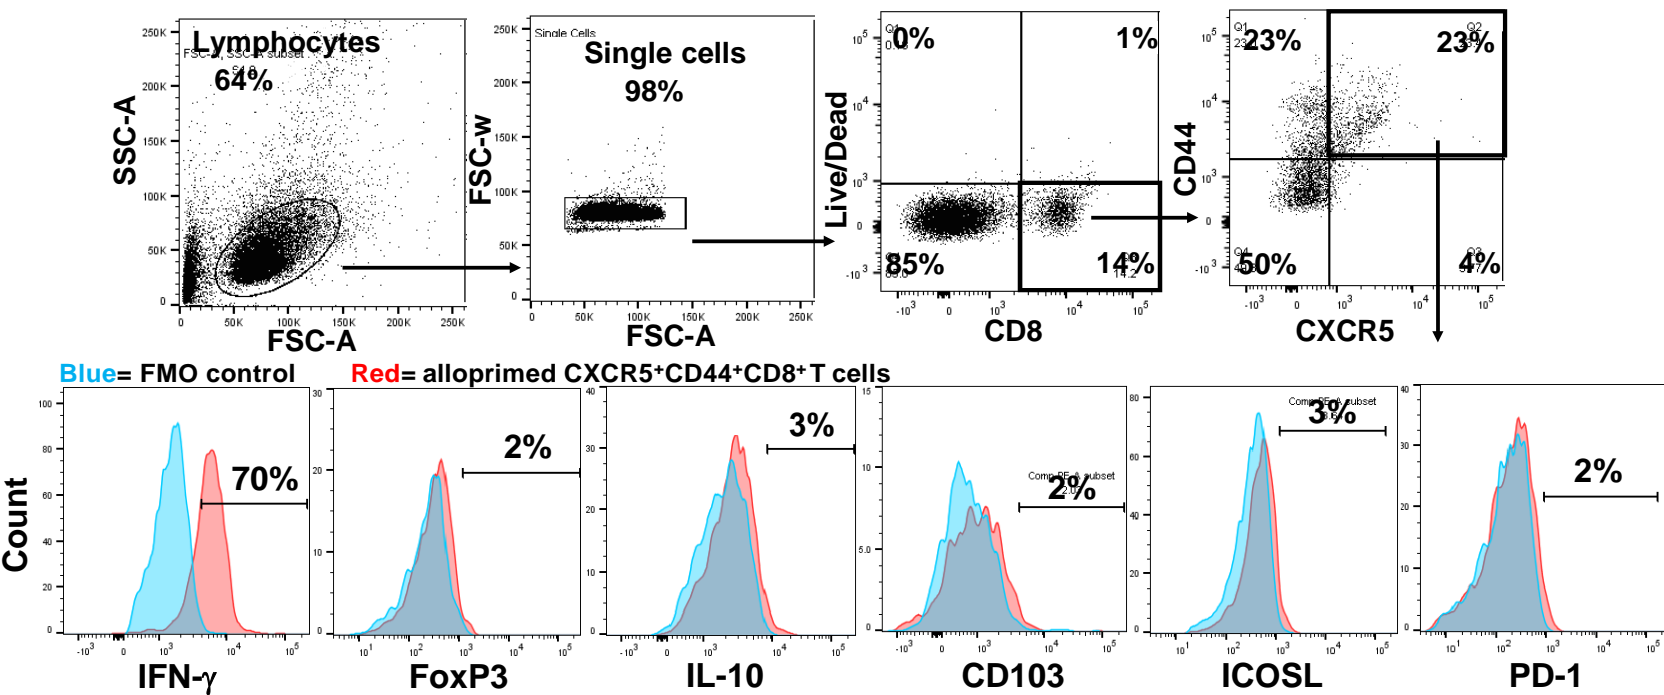

**Figure S1. Alloprimed antibody-suppressor CD8<sup>+</sup> T cells express CXCR5<sup>+</sup>IFN- $\gamma$ <sup>+</sup>CD8<sup>+</sup> phenotype.** C57BL/6 mice (H-2<sup>b</sup>) were transplanted with FVB/N (H-2<sup>q</sup>) hepatocytes on day 0. On day 7, splenocytes were analyzed by flow cytometry. Cells were gated sequentially for lymphocytes, single cells, live CD8<sup>+</sup> T cells, and CD44<sup>+</sup>CXCR5<sup>+</sup> cells. The CXCR5<sup>+</sup>CD44<sup>+</sup>CD8<sup>+</sup> T cell population was analyzed for intracellular and extracellular markers. CXCR5<sup>+</sup>CD44<sup>+</sup>CD8<sup>+</sup> T cells expressed IFN- $\gamma$ , but did not express FoxP3, IL-10, CD103, ICOSL, or PD-1. Fluorescence minus one (FMO) controls were used for setting the positive gates and indicating background staining for plots (representative data shown, n=4).

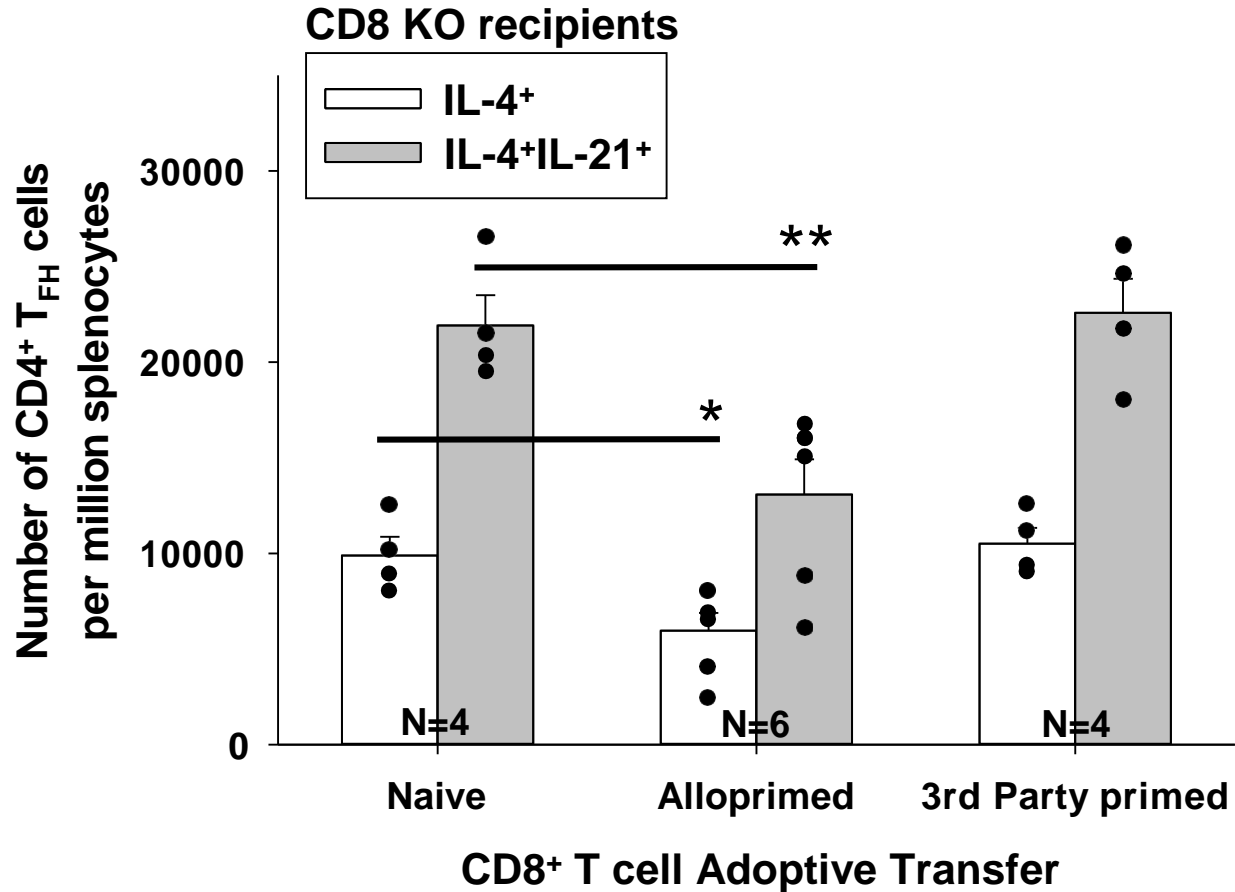

**Figure S2. CD8<sup>+</sup> T cell-mediated suppression of CD4<sup>+</sup> T<sub>FH</sub> cells in vivo is allospecific.** CD8 KO recipients (H-2<sup>b</sup>) were transplanted with FVB/N (H-2<sup>q</sup>) hepatocytes on day 0. On the same day, cohorts of wild-type C57BL/6 mice were transplanted with FVB/N or B10.BR (H-2<sup>k</sup>) hepatocytes to serve as sources for alloprimed CD8<sup>+</sup> T cells and third-party (3<sup>rd</sup>) primed CD8<sup>+</sup> T cells, respectively. On day 5, alloprimed and third-party (3<sup>rd</sup>) primed CD8<sup>+</sup> T cells were collected from C57BL/6 recipients and adoptively transferred (10 million cells) into CD8 KO recipients (day 5 following FVB/N hepatocyte transplant). Adoptive transfer of naïve CD8<sup>+</sup> T cells was used as a negative control. Spleens were harvested 48 hours later and the number of IL-4<sup>+</sup> or IL-4<sup>+</sup>IL-21<sup>+</sup>CD4<sup>+</sup> T<sub>FH</sub> cells were quantified by flow cytometry. Adoptive transfer of alloprimed CD8<sup>+</sup> T cells significantly reduced the number of IL-4<sup>+</sup>CD4<sup>+</sup> T<sub>FH</sub> cells post transplant (6,000±900 cells per million splenocytes, p=0.001, as depicted by “\*”) compared to CD8 KO recipients that received naïve CD8<sup>+</sup> T cells (9,900±1,000 cells per million splenocytes). Similarly, adoptive transfer of alloprimed CD8<sup>+</sup> T cells significantly reduced the number of IL-4<sup>+</sup>IL-21<sup>+</sup>CD4<sup>+</sup> T<sub>FH</sub> cells post transplant (13,000±1,800 cells per million splenocytes, p=0.003, as depicted by “\*\*”) compared to CD8 KO recipients that received naïve CD8<sup>+</sup> T cells (22,000±1,600 cells per million splenocytes). Adoptive transfer of third-party primed CD8<sup>+</sup> T cells did not reduce the number of IL-4<sup>+</sup> (11,000±800 cells per million splenocytes) or IL-4<sup>+</sup>IL-21<sup>+</sup> (23,000±1,800 cells per million splenocytes) CD4<sup>+</sup> T<sub>FH</sub> cells in vivo (p=ns). Data was combined from duplicate experiments (n=4-6 mice per group). Error bars represent standard error.

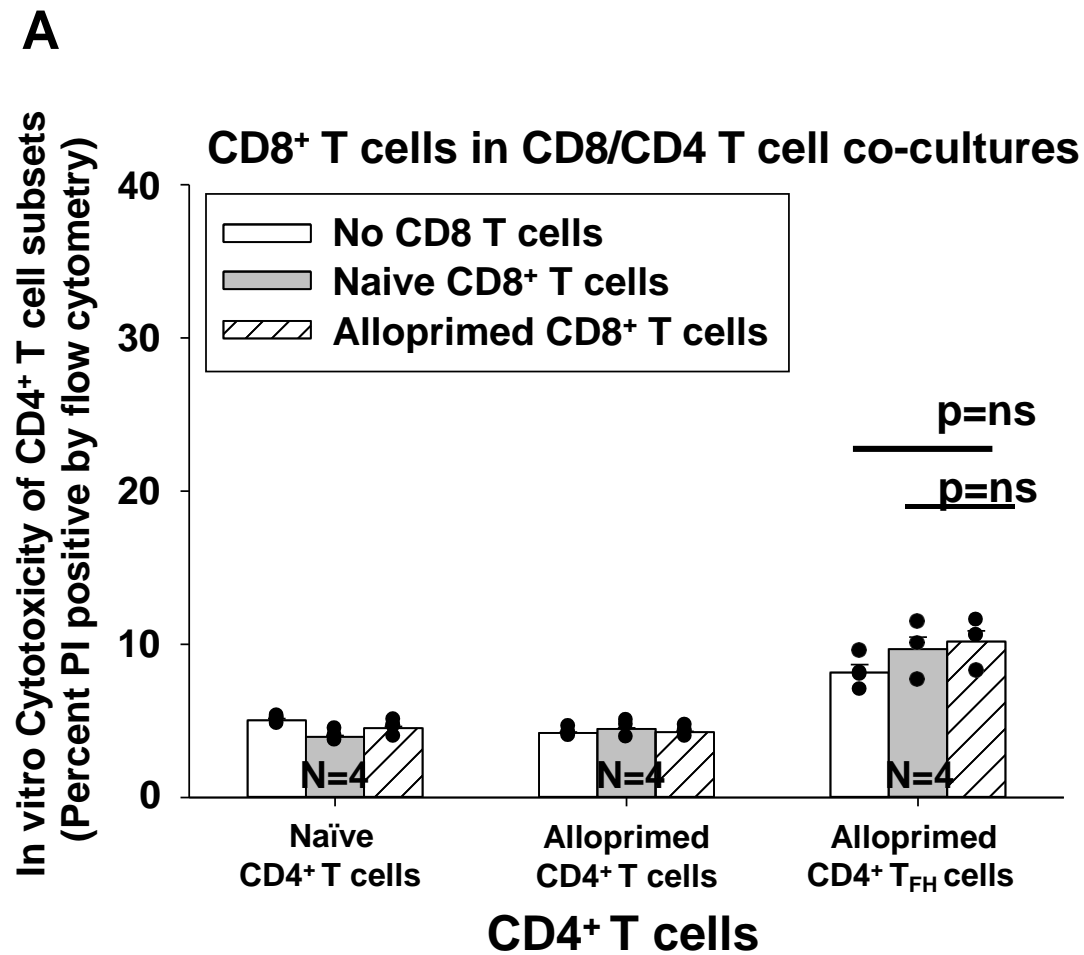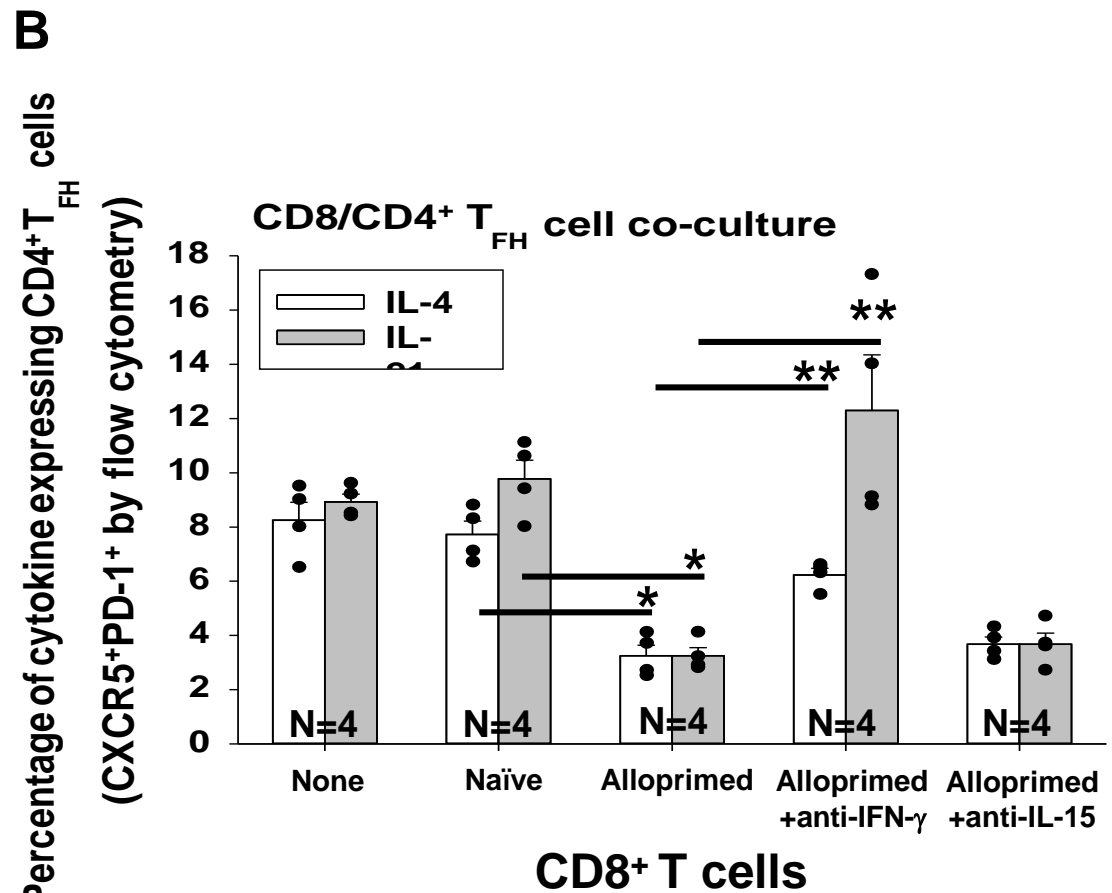

**Figure S3. Alloprimed CD8<sup>+</sup> T cells mediate IFN- $\gamma$ -dependent non cytotoxic inhibition of CD4<sup>+</sup> T<sub>FH</sub> cells in co-culture.** C57BL/6 mice were transplanted with allogeneic (FVB/N, H-2<sup>q</sup>) hepatocytes. On day 7, alloprimed CD8<sup>+</sup> T cells and CD4<sup>+</sup> T cells were retrieved from recipient spleens. CD4<sup>+</sup> T<sub>FH</sub> cells (CXCR5<sup>+</sup>PD-1<sup>+</sup>CD4<sup>+</sup>) were isolated by flow cytometric cell sorting. **A**) Alloprimed CD8<sup>+</sup> T cells were co-cultured with CFSE-labeled naïve, bulk alloprimed CD4<sup>+</sup> T cells, or alloprimed CD4<sup>+</sup> T cells that were flow sorted for CD4<sup>+</sup> T<sub>FH</sub> cells (CXCR5<sup>+</sup>PD-1<sup>+</sup>CD4<sup>+</sup>). After 4 hours of co-culture, CFSE-labeled CD4<sup>+</sup> T cells were collected and analyzed by flow cytometry for apoptosis by propidium iodide (PI) uptake. No significant cytotoxicity was observed in any CD8/CD4 T cell co-cultures compared to cultures without CD8<sup>+</sup> T cells (p=ns). Error bars represent standard error. **B**) CD4<sup>+</sup> T<sub>FH</sub> cells and CD8<sup>+</sup> T cell were co-cultured for 4 hours followed by intracellular cytokine staining and flow cytometric analysis of CD4<sup>+</sup> T<sub>FH</sub> cells. CD4<sup>+</sup> T<sub>FH</sub> cell expression of IL-4 (3.3 $\pm$ 0.4%) and IL-21 (3.3 $\pm$ 0.3%) was significantly reduced in co-cultures with alloprimed CD8<sup>+</sup> T cells compared to co-cultures with control naïve CD8<sup>+</sup> T cells (8.3 $\pm$ 0.7% and 8.9 $\pm$ 0.3%, respectively, p<0.0002, “\*\*\*”). Addition of anti-IFN- $\gamma$  mAb (clone XMG1.2 eBioscience) to co-cultures restored the expression of IL-4 (6.2 $\pm$ 0.2%) and IL-21 expression (12.3 $\pm$ 2.0) (p<0.01 for both “\*\*\*” compared to alloprimed CD8<sup>+</sup> T cell group; p=ns for both compared to naïve/no CD8<sup>+</sup> T cell control groups). Addition of anti-IL-15 mAb (clone AI0.3 eBioscience) to co-cultures had no effect on CD8-mediated inhibition of CD4<sup>+</sup> T<sub>FH</sub> cell IL-4 (3.7 $\pm$ 0.3%) and IL-21 (3.7 $\pm$ 0.4%) expression (p=ns for both).
